# Supplementary material
Source: ML conference proceedings conference paper supplement (https://proceedings.neurips.cc/paper_files/paper/2023/hash/c4bf73386022473a652a18941e9ea6f8-Abstract.html)
Supplement: Supplementary file 1 [file c4bf73386022473a652a18941e9ea6f8-Supplemental-Conference.zip]

Archive with 1 entries (1 files):
- 23_neurips_ExpMaskDRL_appendix.pdf
